# Supplementary material
Source: bioRxiv or medRxiv preprint supplement (https://medrxiv.org/highwire/filestream/86312/field_highwire_adjunct_files/0/2020.06.16.20133181-1.pdf)
Supplement: Supplementary file [file 2020.06.16.20133181-1.pdf]

## **Supplementary Appendix**

### **Table of Contents**

#### **Supplementary Figures**

|                                                            |   |
|------------------------------------------------------------|---|
| Table S1 COVID-19 Disease Severity<br>Definition.....      | 1 |
| Table S2 Details Regarding Positive Blood<br>Cultures..... | 2 |

**Table S1. COVID-19 Disease Severity Definition**

| <b>Disease Severity</b> |                                                                                                                                                                                                                                                                                                                                                                                                                                                                                                                                                                 |
|-------------------------|-----------------------------------------------------------------------------------------------------------------------------------------------------------------------------------------------------------------------------------------------------------------------------------------------------------------------------------------------------------------------------------------------------------------------------------------------------------------------------------------------------------------------------------------------------------------|
| <b>Mild</b>             | <p>Not admitted <u>or</u></p> <p>Admitted with:</p> <ul style="list-style-type: none"> <li>• No evidence of pneumonia on imaging</li> <li>• No risk factors for ARDS/mortality</li> </ul>                                                                                                                                                                                                                                                                                                                                                                       |
| <b>Moderate</b>         | <ul style="list-style-type: none"> <li>• Evidence of pneumonia</li> <li>• SpO<sub>2</sub> ≤ 93% on room air</li> <li>• Respiratory distress (e.g. RR &gt; 30/min)</li> </ul>                                                                                                                                                                                                                                                                                                                                                                                    |
| <b>Severe</b>           | <p>Any of the following:</p> <ul style="list-style-type: none"> <li>• Evidence of pneumonia</li> <li>• SpO<sub>2</sub> ≤ 93% on room air</li> <li>• Respiratory distress (e.g. RR &gt; 30/min)</li> </ul> <p style="text-align: center;"><b>AND</b></p> <p>Any of the following:</p> <ul style="list-style-type: none"> <li>• PaO<sub>2</sub>/FiO<sub>2</sub> &lt; 300 mmHg</li> <li>• Substantial imaging progression (&gt;50%) within 48 hrs</li> <li>• Eminent respiratory failure</li> <li>• Active mechanical ventilation</li> <li>• ICU status</li> </ul> |

**Table S2. Details Regarding Positive Blood Cultures**

| <b>Patient</b> | <b>Organism</b>                                                                      | <b>Treatment</b>                                            |
|----------------|--------------------------------------------------------------------------------------|-------------------------------------------------------------|
| Patient 1 - 4  | <i>Coagulase-negative Staphylococcus</i> , unspiciated 1 of 2 sets                   | Considered to be contaminant                                |
| Patient 5      | <i>Staphylococcus simulans</i> 1 of 2 sets                                           | Considered to be contaminant                                |
| Patient 6      | <i>Dermabacter hominis</i> 1 of 2 sets                                               | Considered to be contaminant                                |
| Patient 7      | <i>Staphylococcus hominis</i> 1 of 2 sets,<br><i>Rothia mucilaginosa</i> 1 of 2 sets | Considered to be contaminant                                |
| Patient 8      | <i>Streptococcus pyogenes</i> 1 of 2 sets, <i>Proteus mirabilis</i> 1 of 2 sets      | Considered to be contaminant                                |
| Patient 9      | <i>Klebsiella pneumoniae</i> 1 of 2 sets                                             | Piperacillin/tazobactam, then<br>Ceftriaxone x total 7 days |
